# Supplementary material for: Studying the “Rigid–Flexible” Properties of Polymeric Micelle Core-Forming Segments with a Hydrophobic Phthalocyanine Probe Using NMR and UV Spectroscopy
Source: PubMed Central journal article supplement (PMC8154882; doi:10.1021/acs.langmuir.1c00328), 2021-04-02
Supplement: la1c00328_si_001.pdf [file la1c00328_si_001.pdf]

## **Supporting Information**

Studying the „Rigid-Flexible” Properties of Polymeric Micelles Core-Forming Segments by a Hydrophobic Phthalocyanine Probe using NMR and UV Spectroscopies

Łukasz Lamch\*, Roman Gancarz, Marta Tsirigotis-Maniecka, Izabela Moszyńska, Justyna Ciejka, Kazimiera A. Wilk\*

Department of Engineering and Technology of Chemical Processes, Faculty of Chemistry,  
Wrocław University of Science and Technology, Wybrzeże Wyspiańskiego 27, 50-370 Wrocław,  
Poland

\* To whom correspondence should be addressed

phone: +48 71 3203447, fax: +48 71 3203678

email addresses: lukasz.lamch@pwr.edu.pl, kazimiera.wilk@pwr.edu.pl

| <b>Table of contents</b>                                                                                                                | <b>Page</b> |
|-----------------------------------------------------------------------------------------------------------------------------------------|-------------|
| 1. Polymeric micelles size and its distribution by DLS and DOSY NMR                                                                     | S2          |
| 2. Polymeric micelles colloidal stability by DLS                                                                                        | S2          |
| 3. Polymeric micelles – raw DLS data                                                                                                    | S3          |
| 4. Solubilization of ZnPc- <i>t</i> -but <sub>4</sub> in mPEG- <i>b</i> -PCL and mPEG- <i>b</i> -PDLLA micelles                         | S4          |
| 5. Solubility and miscibility parameters for ZnPc- <i>t</i> -but <sub>4</sub> in mPEG- <i>b</i> -PCL and mPEG- <i>b</i> -PDLLA micelles | S6          |
| 6. Determination of diffusion coefficients and hydrodynamic diameters for polymeric micelles                                            | S7          |

*1. Polymeric micelles size and its distribution by DLS and DOSY NMR*

**Table S1. Diffusion coefficients ( $D_1$  and  $D_2$ ) and calculated hydrodynamic diameters (denoted as  $2R_h$ ) for the two populations of empty mPEG-*b*-PCL and mPEG-*b*-PDLLA micelles as well as hydrodynamic diameters obtained from DLS experiments.**

| Block copolymer       | polymeric micelles                      |             | non aggregated copolymer                |             | $D_H$ (nm) by DLS |
|-----------------------|-----------------------------------------|-------------|-----------------------------------------|-------------|-------------------|
|                       | $D_1 \times 10^{-11}$ m <sup>2</sup> /s | $2R_h$ (nm) | $D_2 \times 10^{-10}$ m <sup>2</sup> /s | $2R_h$ (nm) |                   |
| mPEG- <i>b</i> -PCL   | 1.104±0.011                             | 36.2±0.4    | 1.537±0.026                             | 2.6±0.1     | 38.0±1.1          |
| mPEG- <i>b</i> -PDLLA | 1.671±0.079                             | 23.9±1.1    | 1.551±0.023                             | 2.6±0.1     | 25.8±0.5          |

*2. Polymeric micelles colloidal stability by DLS*

**Table S2. Colloidal stability of the studied polymeric micelles without payload.**

| System      | Block copolymer       | [copolymer] (mg/cm <sup>3</sup> ) | $D_H$ (nm) | PdI       |
|-------------|-----------------------|-----------------------------------|------------|-----------|
| t = 0       |                       |                                   |            |           |
| 1a          | mPEG- <i>b</i> -PCL   | 6.7                               | 38.0±1.1   | 0.09±0.02 |
| 2a          | mPEG- <i>b</i> -PDLLA | 6.7                               | 25.8±0.5   | 0.27±0.01 |
| t = 30 days |                       |                                   |            |           |
| 1a          | mPEG- <i>b</i> -PCL   | 6.7                               | 39.0±0.5   | 0.12±0.01 |

|             |                       |     |          |           |
|-------------|-----------------------|-----|----------|-----------|
| 2a          | mPEG- <i>b</i> -PDLLA | 6.7 | 25.3±1.6 | 0.26±0.01 |
| t = 60 days |                       |     |          |           |
| 1a          | mPEG- <i>b</i> -PCL   | 6.7 | 39.6±0.7 | 0.15±0.01 |
| 2a          | mPEG- <i>b</i> -PDLLA | 6.7 | 27.7±2.1 | 0.25±0.01 |

### 3. Polymeric micelles – raw DLS data

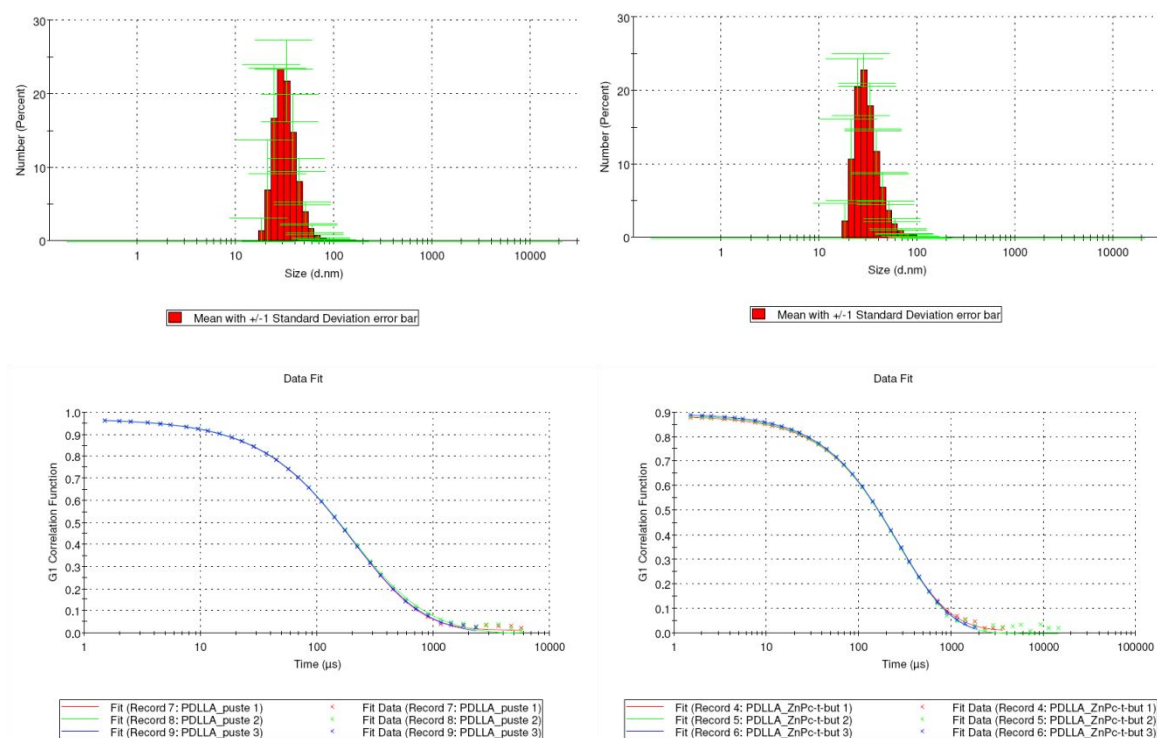

**Figure S1. Autocorrelation functions and size statistic reports by number (raw data) for empty (left) and ZnPc-*t*-but<sub>4</sub>-loaded (right) mPEG-*b*-PDLLA micelles.**

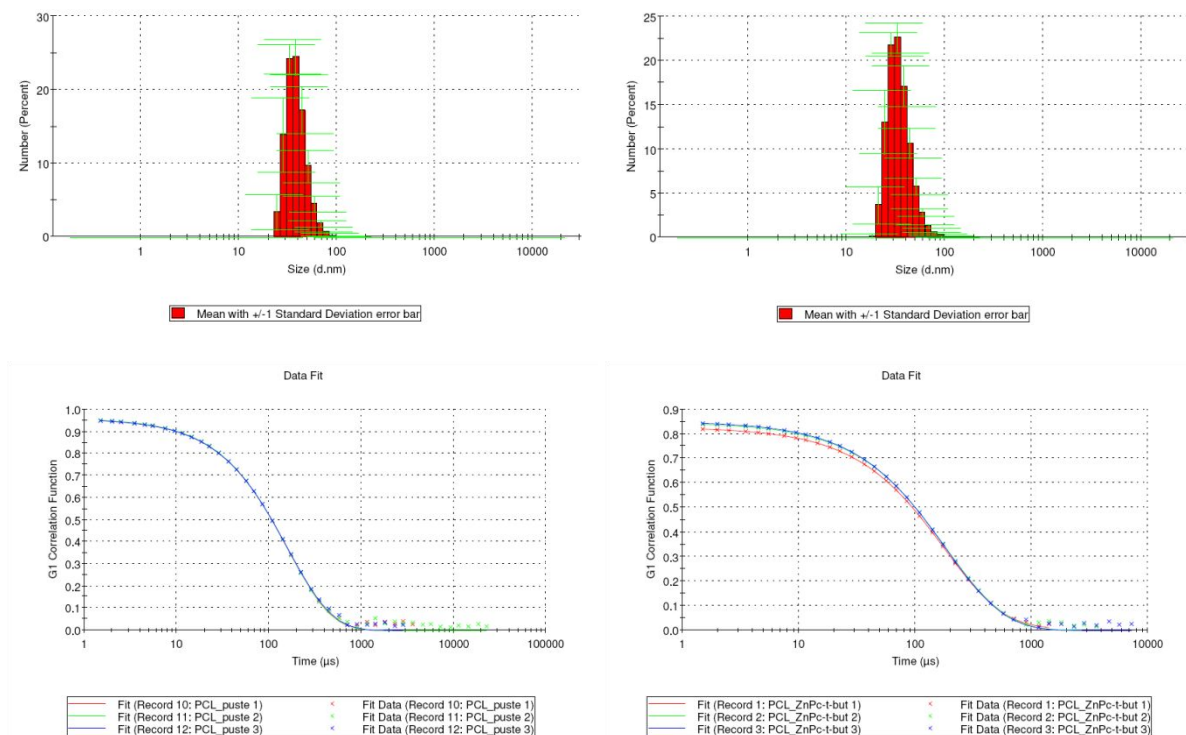

**Figure S2. Autocorrelation functions and size statistic reports by number (raw data) for empty (left) and ZnPc-*t*-but<sub>4</sub>-loaded (right) mPEG-*b*-PCL micelles.**

#### 4. Solubilization of ZnPc-*t*-but<sub>4</sub> in mPEG-*b*-PCL and mPEG-*b*-PDLLA micelles

The ZnPc-*t*-but<sub>4</sub> concentration in polymeric micelles ( $[\text{ZnPc-}t\text{-but}_4]_{\text{micelle}}$ ) was calculated from Lambert-Beer equation, while the percentage loading efficiency was determined by the following formula:

$$\% \text{ loading efficiency} = \frac{[\text{ZnPc-}t\text{-but}_4]_{\text{micelle}}}{[\text{ZnPc-}t\text{-but}_4]_{\text{added}}} 100\% \quad (1)$$

The highest  $[\text{ZnPc-}t\text{-but}_4]_{\text{micelle}}$  at which 100% loading efficiency was achieved ( $\max[\text{ZnPc-}t\text{-but}_4]_{\text{micelle}100\%}$ ) was used to calculate the maximum concentration of phthalocyanine contained in micelles ( $\max[\text{ZnPc-}t\text{-but}_4]_{\text{micelle}}$ ) by

$$\max[\text{ZnPc-}t\text{-but}_4]_{\text{micelle}} = \max[\text{ZnPc-}t\text{-but}_4]_{\text{micelle}100\%} - [\text{ZnPc-}t\text{-but}_4]_{\text{aqueous}} \quad (2)$$

For all phthalocyanines  $[\text{ZnPc-}t\text{-but}_4]_{\text{aqueous}} \ll \max[\text{ZnPc-}t\text{-but}_4]_{\text{micelle } 100\%}$  so  $\max[\text{ZnPc-}t\text{-but}_4]_{\text{micelle}} \approx \max[\text{ZnPc-}t\text{-but}_4]_{\text{micelle } 100\%}$   $[\text{ZnPc-}t\text{-but}_4]_{\text{aqueous}}$  was calculated by ChemAxon software for neutral pH and was found to be equal to  $2.45 \times 10^{-14}$  mg/mL.

Percentage Ps/polymer ratio (described by wt%) was calculated by the following formula:

$$\% \text{ Ps/polymer ratio} = \frac{\max[\text{ZnPc-}t\text{-but}_4]_{\text{micelle}}}{[\text{polymer}]_{\text{micelle}}} 100\% \quad (3)$$

The polymer concentration in micelles ( $[\text{polymer}]_{\text{micelle}}$ ) was calculated by:

$$[\text{polymer}]_{\text{micelle}} = [\text{polymer}]_{\text{added}} - \text{CMC} \quad (4)$$

The polymer concentrations  $[\text{polymer}]_{\text{added}}$  (6.7 mg/mL for mPEG-*b*-PCL and mPEG-*b*-PDLLA) were about three orders of magnitude higher than CMC value of mPEG-*b*-PCL and mPEG-*b*-PDLLA copolymers ( $4.5 \times 10^{-3}$  mg/mL and  $1.0 \times 10^{-3}$  mg/mL, respectively) so  $[\text{polymer}]_{\text{micelle}} \approx [\text{polymer}]_{\text{added}}$ .

The partition coefficients of each phthalocyanines in polymeric micelles at their  $\max[\text{ZnPc-}t\text{-but}_4]_{\text{micelle}}$  were determined using the equation:

$$\frac{[\text{ZnPc-}t\text{-but}_4]_{\text{micelle}}}{[\text{ZnPc-}t\text{-but}_4]_{\text{aqueous}}} = P X_{\text{polymer}} \frac{C}{\rho} \quad (5)$$

where  $P$  is the partition coefficient of the drug.  $C$  the concentration of copolymer ( $6.7 \times 10^{-3}$  g/mL).  $X_{\text{polymer}}$  – the mole fraction of hydrophobic part in block copolymer (0.438 for mPEG-*b*-PCL and 0.554 for mPEG-*b*-PDLLA) and  $\rho$  the bulk density of PCL and PDLLA (1.145 and 1.250 g/mL, respectively).

**Table S3. Composition, payload/block copolymer ratio, loading efficiency, polymeric micelles-water partition coefficient (logP), hydrodynamic diameter ( $D_H$ ) and its distribution (PdI) of the studied polymeric micelles.**

| System | Block copolymer | [copolymer] | $[\text{ZnPc-}t\text{-but}_4]_{\text{micelle}}$ | ZnPc- <i>t</i> -but <sub>4</sub> / | Loading | logP | $D_H$ (nm) | PdI |
|--------|-----------------|-------------|-------------------------------------------------|------------------------------------|---------|------|------------|-----|
|--------|-----------------|-------------|-------------------------------------------------|------------------------------------|---------|------|------------|-----|

|             |                       | (mg/mL) | ( $\mu$ M)      | polymer ratio (%) | efficiency (%) |      |                |                 |
|-------------|-----------------------|---------|-----------------|-------------------|----------------|------|----------------|-----------------|
| t = 0       |                       |         |                 |                   |                |      |                |                 |
| 1b          | mPEG- <i>b</i> -PCL   | 6.7     | 102.8 $\pm$ 2.7 | 15.3 $\pm$ 1.2    | 100 $\pm$ 9    | 15.3 | 39.3 $\pm$ 0.3 | 0.13 $\pm$ 0.01 |
| 2b          | mPEG- <i>b</i> -PDLLA | 6.7     | 67.4 $\pm$ 1.8  | 10.0 $\pm$ 0.7    | 92 $\pm$ 9     | 15.2 | 26.7 $\pm$ 1.4 | 0.27 $\pm$ 0.02 |
| t = 30 days |                       |         |                 |                   |                |      |                |                 |
| 1b          | mPEG- <i>b</i> -PCL   | 6.7     | 103.4 $\pm$ 2.1 | 15.3 $\pm$ 1.2    | 99 $\pm$ 10    | 15.3 | 38.4 $\pm$ 1.4 | 0.10 $\pm$ 0.01 |
| 2b          | mPEG- <i>b</i> -PDLLA | 6.7     | 67.1 $\pm$ 1.6  | 10.0 $\pm$ 0.7    | 100 $\pm$ 11   | 15.2 | 25.0 $\pm$ 0.7 | 0.28 $\pm$ 0.01 |
| t = 60 days |                       |         |                 |                   |                |      |                |                 |
| 1b          | mPEG- <i>b</i> -PCL   | 6.7     | 102.1 $\pm$ 2.3 | 15.3 $\pm$ 1.2    | 100 $\pm$ 9    | 15.3 | 37.6 $\pm$ 1.2 | 0.11 $\pm$ 0.01 |
| 2b          | mPEG- <i>b</i> -PDLLA | 6.7     | 66.8 $\pm$ 2.0  | 10.0 $\pm$ 0.7    | 100 $\pm$ 9    | 15.2 | 25.9 $\pm$ 0.9 | 0.29 $\pm$ 0.02 |

### 5. Solubility and miscibility parameters for ZnPc-*t*-but<sub>4</sub> in mPEG-*b*-PCL and mPEG-*b*-PDLLA micelles

Solubility parameters ( $\delta_x$ ) for the studied block copolymers (mPEG-*b*-PCL and mPEG-*b*-PDLLA) and probe (ZnPc-*t*-but<sub>4</sub>) were calculated Hoy's group increment method, utilizing values of cohesive energy ( $E_{coh}$ ) group contributions and molar volumes ( $V$ ) provided by Fedors:

$$\delta_x = \sqrt{\frac{E_{coh}}{V}} \quad (6)$$

The calculated values of solubility parameters for particular blocks of copolymers (PEG, PCL and PDLLA) and payload (ZnPc-*t*-but<sub>4</sub>), denoted as  $\delta_p$  and  $\delta_s$ , respectively, were used for calculation of miscibility parameter (Flory-Huggins interaction parameter –  $\chi$ ):

$$\chi = (\delta_p - \delta_s)^2 \frac{V}{RT} \quad (7)$$

Where  $V$  is molar volume of the payload,  $R$  – the universal gas constant and  $T$  – temperature in Kelvins.

**Table S4. Solubility parameters ( $\delta_p$ ) of particular polymers' fragments and miscibility ( $\chi$ ) parameters between polymers' fragments and water ( $\delta_a$  equal to 47.9 MPa<sup>0.5</sup>).**

| Polymer fragment | $E_{coh}$ [J/mol] | $V$ [cm <sup>3</sup> /mol] | $\delta_p$ [MPa <sup>0.5</sup> ] | $\chi$ |
|------------------|-------------------|----------------------------|----------------------------------|--------|
| PEG              | 13230             | 36.0                       | 19.2                             | 12.0   |
| PCL              | 42700             | 98.5                       | 20.9                             | 29.2   |
| PDLLA            | 26140             | 50.5                       | 22.9                             | 12.9   |

**Table S5. Solubility parameters ( $\delta_p$ ) of particular polymers' fragments and miscibility ( $\chi$ ) parameters between polymers' fragments and ZnPc-*t*-but<sub>4</sub> ( $\delta_s$  equal to 22.7 MPa<sup>0.5</sup>).**

| Polymer fragment | $E_{coh}$ [J/mol] | $V$ [cm <sup>3</sup> /mol] | $\delta_p$ [MPa <sup>0.5</sup> ] | $\chi$ |
|------------------|-------------------|----------------------------|----------------------------------|--------|
| PEG              | 13230             | 36.0                       | 19.2                             | 2.45   |
| PCL              | 42700             | 98.5                       | 20.9                             | 0.70   |
| PDLLA            | 26140             | 50.5                       | 22.9                             | 0.01   |

6. Determination of diffusion coefficients and hydrodynamic diameters for polymeric micelles

$$A = A_1 \exp\left(-D_1\left(\Delta - \frac{\delta}{3}\right)(\delta \gamma G_i)^2\right)$$

Monoexponential  
function (one diffusion  
coefficient):

$$A = A_1 \exp\left(-D_1\left(\Delta - \frac{\delta}{3}\right)(\delta \gamma G_i)^2\right) + A_2 \exp\left(-D_2\left(\Delta - \frac{\delta}{3}\right)(\delta \gamma G_i)^2\right)$$

Biexponential  
function (two diffusion  
coefficients):

$$A = A_1 \exp\left(-D_1\left(\Delta - \frac{\delta}{3}\right)(\delta \gamma G_i)^2\right) + A_2 \exp\left(-D_2\left(\Delta - \frac{\delta}{3}\right)(\delta \gamma G_i)^2\right) +$$

Triexponential  
function (three  
diffusion coefficients):

$$+ A_3 \exp\left(-D_3\left(\Delta - \frac{\delta}{3}\right)(\delta \gamma G_i)^2\right)$$

**Table S6. Determination of diffusion coefficients ( $D$ ) and hydrodynamic diameters ( $D_H$ ) by fitting appropriate models to data:  $G^1$  (intensity versus linear gradient) or  $G^2$  (intensity versus square gradient). Bold – the best fit.**

| Block copolymer       | Model ( $G^1$ or $G^2$ )        | empty                           |                         |                         | +ZnPc- <i>t</i> -but <sub>4</sub> |                        |                |
|-----------------------|---------------------------------|---------------------------------|-------------------------|-------------------------|-----------------------------------|------------------------|----------------|
|                       |                                 | $D$ [m <sup>2</sup> /s]         | $D_H$ [nm]              | R <sup>2</sup>          | $D$ [m <sup>2</sup> /s]           | $D_H$ [nm]             | R <sup>2</sup> |
| mPEG- <i>b</i> -PCL   | G <sup>1</sup> (1 coefficient)  | 1.950×10 <sup>-11</sup>         | 20.5                    | 0.91949                 | 1.974×10 <sup>-11</sup>           | 20.3                   | 0.88651        |
|                       | G <sup>1</sup> (2 coefficients) | <b>1.537×10<sup>-10</sup></b>   | <b>2.6</b>              | <b>0.99994</b>          | <b>1.849×10<sup>-10</sup></b>     | <b>2.2</b>             | <b>0.99907</b> |
|                       |                                 | <b>1.104×10<sup>-11</sup></b>   | <b>36.3</b>             |                         | <b>1.051×10<sup>-11</sup></b>     | <b>38.1</b>            |                |
|                       | G <sup>1</sup> (3 coefficients) | 1.666×10 <sup>-10</sup>         | 2.4                     | 0.99996                 | 1.818×10 <sup>-9</sup>            | 0.2                    | 0.99993        |
|                       |                                 | 3.739×10 <sup>-11</sup>         | 10.7                    |                         | 1.539×10 <sup>-10</sup>           | 2.6                    |                |
|                       |                                 | 9.920×10 <sup>-12</sup>         | 40.4                    |                         | 1.003×10 <sup>-11</sup>           | 39.9                   |                |
|                       | G <sup>2</sup> (1 coefficient)  | 1.947×10 <sup>-11</sup>         | 20.6                    | 0.91949                 | 1.979×10 <sup>-11</sup>           | 20.2                   | 0.88651        |
|                       |                                 | <b>1.537×10<sup>-10</sup></b>   | <b>2.6</b>              | <b>0.99994</b>          | <b>1.848×10<sup>-10</sup></b>     | <b>2.2</b>             | <b>0.99907</b> |
|                       | G <sup>2</sup> (2 coefficients) | <b>1.104×10<sup>-11</sup></b>   | <b>36.3</b>             |                         | <b>1.051×10<sup>-11</sup></b>     | <b>38.1</b>            |                |
|                       |                                 | G <sup>2</sup> (3 coefficients) | 1.666×10 <sup>-10</sup> | 2.4                     | 0.99996                           | 1.817×10 <sup>-9</sup> | 0.2            |
|                       | 3.739×10 <sup>-11</sup>         |                                 | 10.7                    | 1.539×10 <sup>-10</sup> |                                   | 2.6                    |                |
|                       | 9.918×10 <sup>-12</sup>         |                                 | 40.4                    | 1.003×10 <sup>-11</sup> |                                   | 39.9                   |                |
| mPEG- <i>b</i> -PDLLA | G <sup>1</sup> (1 coefficient)  | 9.082×10 <sup>-11</sup>         | 4.4                     | 0.96869                 | 5.738×10 <sup>-11</sup>           | 7.0                    | 0.86565        |
|                       | G <sup>1</sup> (2 coefficients) | <b>1.551×10<sup>-10</sup></b>   | <b>2.6</b>              | <b>0.99990</b>          | <b>2.382×10<sup>-10</sup></b>     | <b>1.7</b>             | <b>0.99477</b> |
|                       |                                 | <b>1.666×10<sup>-11</sup></b>   | <b>24.0</b>             |                         | <b>1.444×10<sup>-11</sup></b>     | <b>27.7</b>            |                |
|                       | G <sup>1</sup> (3 coefficients) | 1.560×10 <sup>-10</sup>         | 2.6                     | 0.99988                 | 2.053×10 <sup>-9</sup>            | 0.2                    | 0.99988        |
|                       |                                 | -6.812×10 <sup>-11</sup>        | -5.9                    |                         | 1.644×10 <sup>-10</sup>           | 2.4                    |                |
|                       |                                 | 1.728×10 <sup>-11</sup>         | 23.2                    |                         | 1.152×10 <sup>-11</sup>           | 34.7                   |                |
|                       | G <sup>2</sup> (1 coefficient)  | 1.233×10 <sup>-10</sup>         | 3.3                     | 0.99644                 | 5.737×10 <sup>-11</sup>           | 7.0                    | 0.86565        |
|                       |                                 | <b>1.551×10<sup>-10</sup></b>   | <b>2.6</b>              | <b>0.99990</b>          | <b>2.380×10<sup>-10</sup></b>     | <b>1.7</b>             | <b>0.99477</b> |
|                       | G <sup>2</sup> (2 coefficients) | <b>1.671×10<sup>-11</sup></b>   | <b>24.0</b>             |                         | <b>1.448×10<sup>-11</sup></b>     | <b>27.7</b>            |                |
|                       |                                 | G <sup>2</sup> (3 coefficients) | 1.551×10 <sup>-10</sup> | 2.6                     | 0.99988                           | 2.052×10 <sup>-9</sup> | 0.2            |
|                       | 1.551×10 <sup>-10</sup>         |                                 | 2.6                     | 1.644×10 <sup>-10</sup> |                                   | 2.4                    |                |
|                       | 1.671×10 <sup>-11</sup>         |                                 | 24.0                    | 1.152×10 <sup>-11</sup> |                                   | 34.8                   |                |
